# Supplementary material for: Genomic Analyses of Three Malaria Vectors Reveals Extensive Shared Polymorphism but Contrasting Population Histories
Source: PubMed Central journal article supplement (PMC3969563; doi:10.1093/molbev/msu040), 2014-01-09
Supplement: supp_msu040_SupplementaryFigures9to14ForMBEresubmission.pdf [file supp_msu040_SupplementaryFigures9to14ForMBEresubmission.pdf]

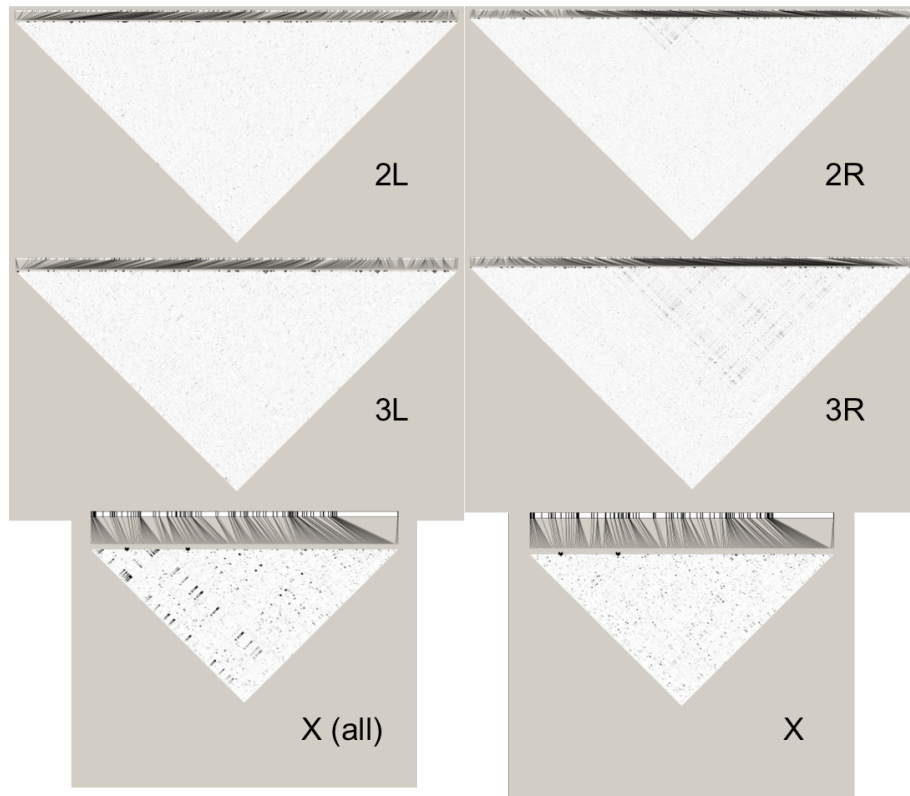

Supplementary Figure S10. LD plots for each *An. arabiensis* chromosome arm. X (all) includes sample KA11.

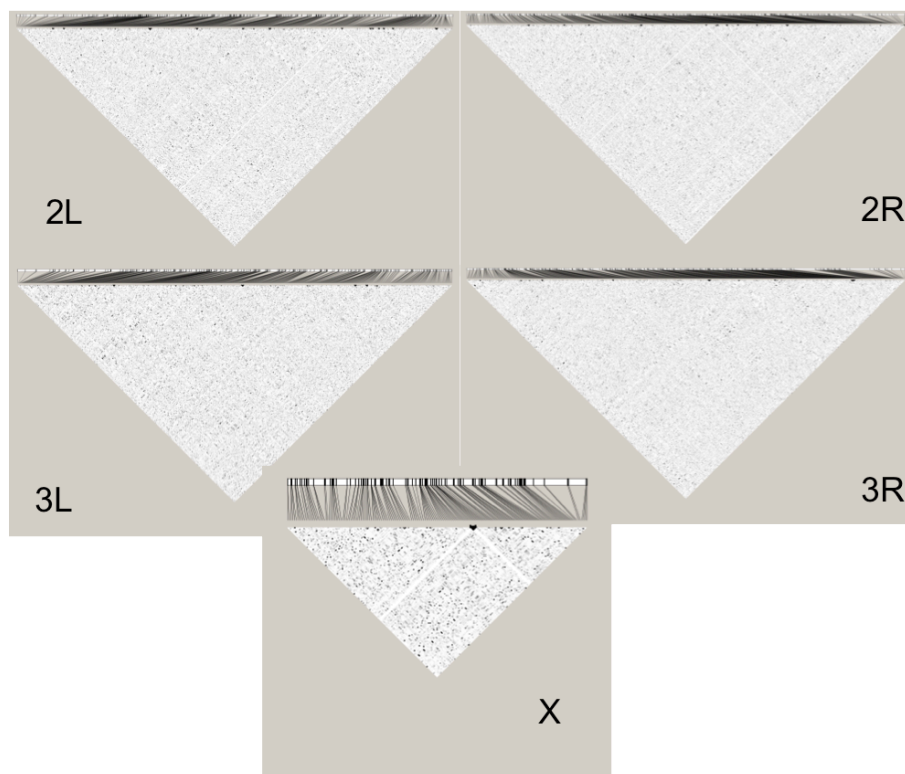

Supplementary Figure S11. LD plots for each *An. merus* chromosome arm.

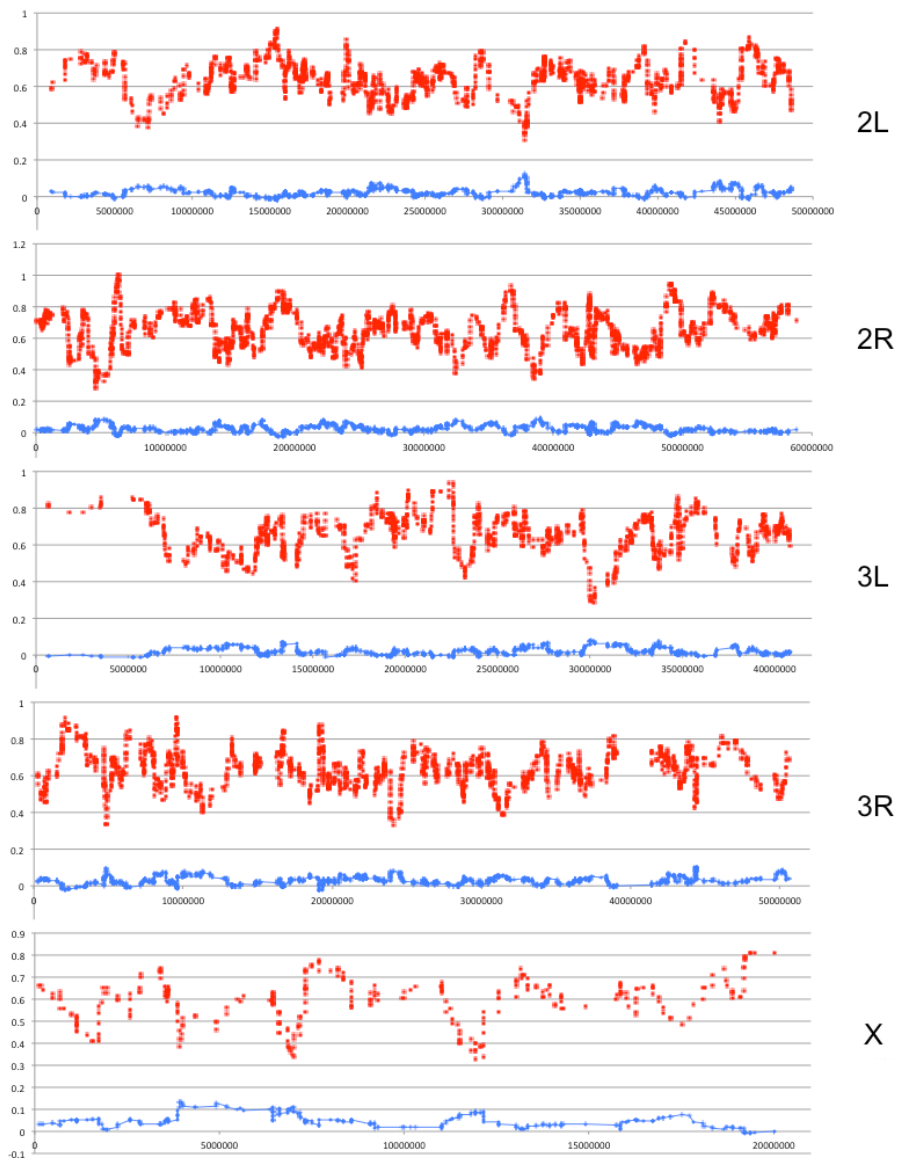

Supplementary Figure S12. Fst (blue line) and p-value (red line) between *An. gambiae* populations. Sliding window of 25 SNPs in 1 SNP steps. P-value from 8000 permutations.

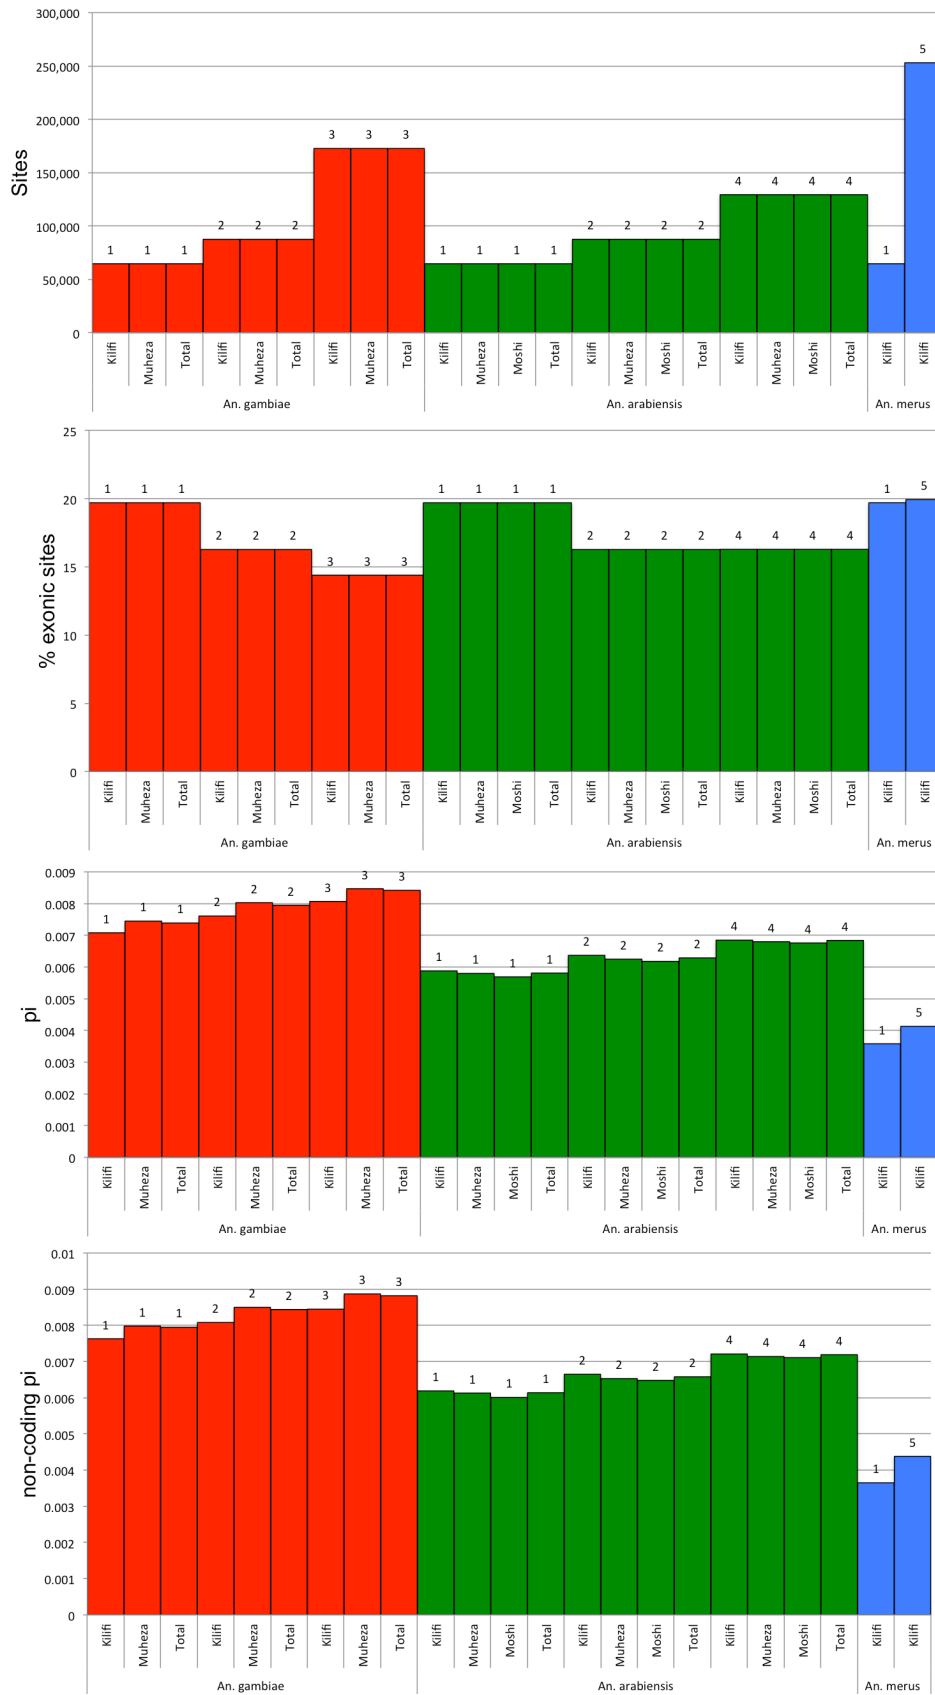

Supplementary Figure S13. Number of sites, percent exonic sites, nucleotide diversity ( $\pi$ ), and non-coding  $\pi$  for each species, for each data set described in Table 1. Each column is labeled with the number of the corresponding data set.

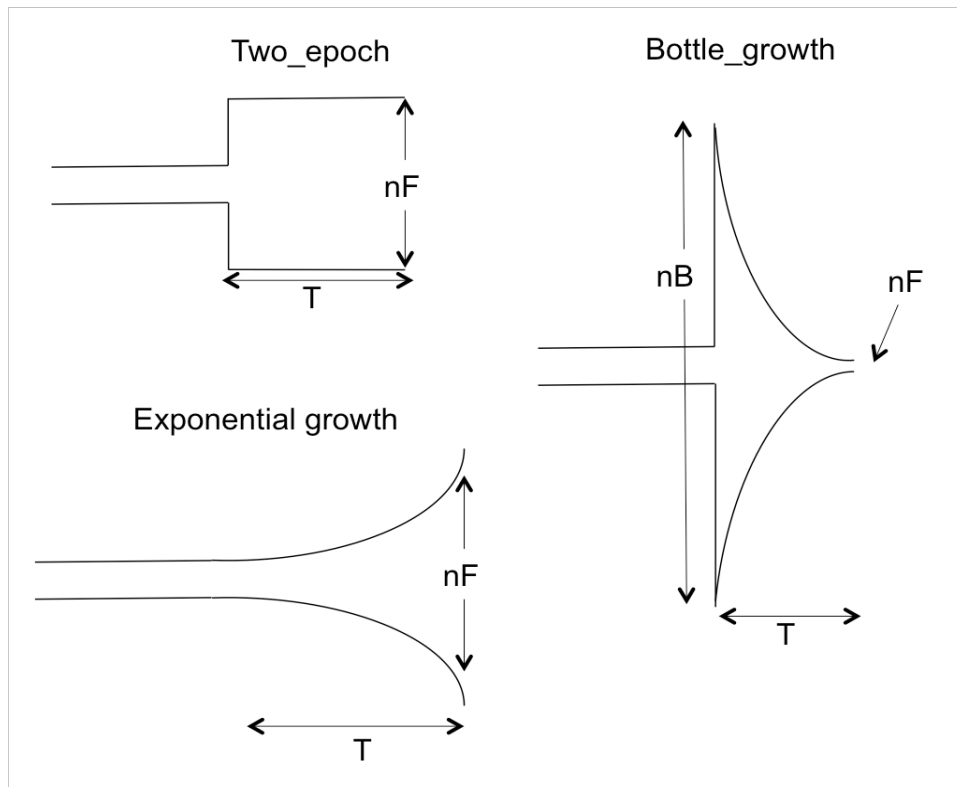

Supplementary Figure S14. The three best *dadi* demographic models. Two\_epoch: one instantaneous size change time  $T$  ago to  $nF$  (final population size). Exp\_growth: Exponential growth (or shrinkage) starting time  $T$  ago, resulting in final populations size  $nF$ . Bottle\_growth: Instantaneous size change time  $T$  ago, followed by exponential growth (or shrinkage) to final size  $nF$ .
